# Supplementary figures and images for: State-of-the-art climate modeling of extreme precipitation over Africa: analysis of CORDEX added-value over CMIP5
Source: Springer Nature journal article supplement (doi:10.1007/s00704-018-2650-y), 2018-10-05

## JJAS - Season

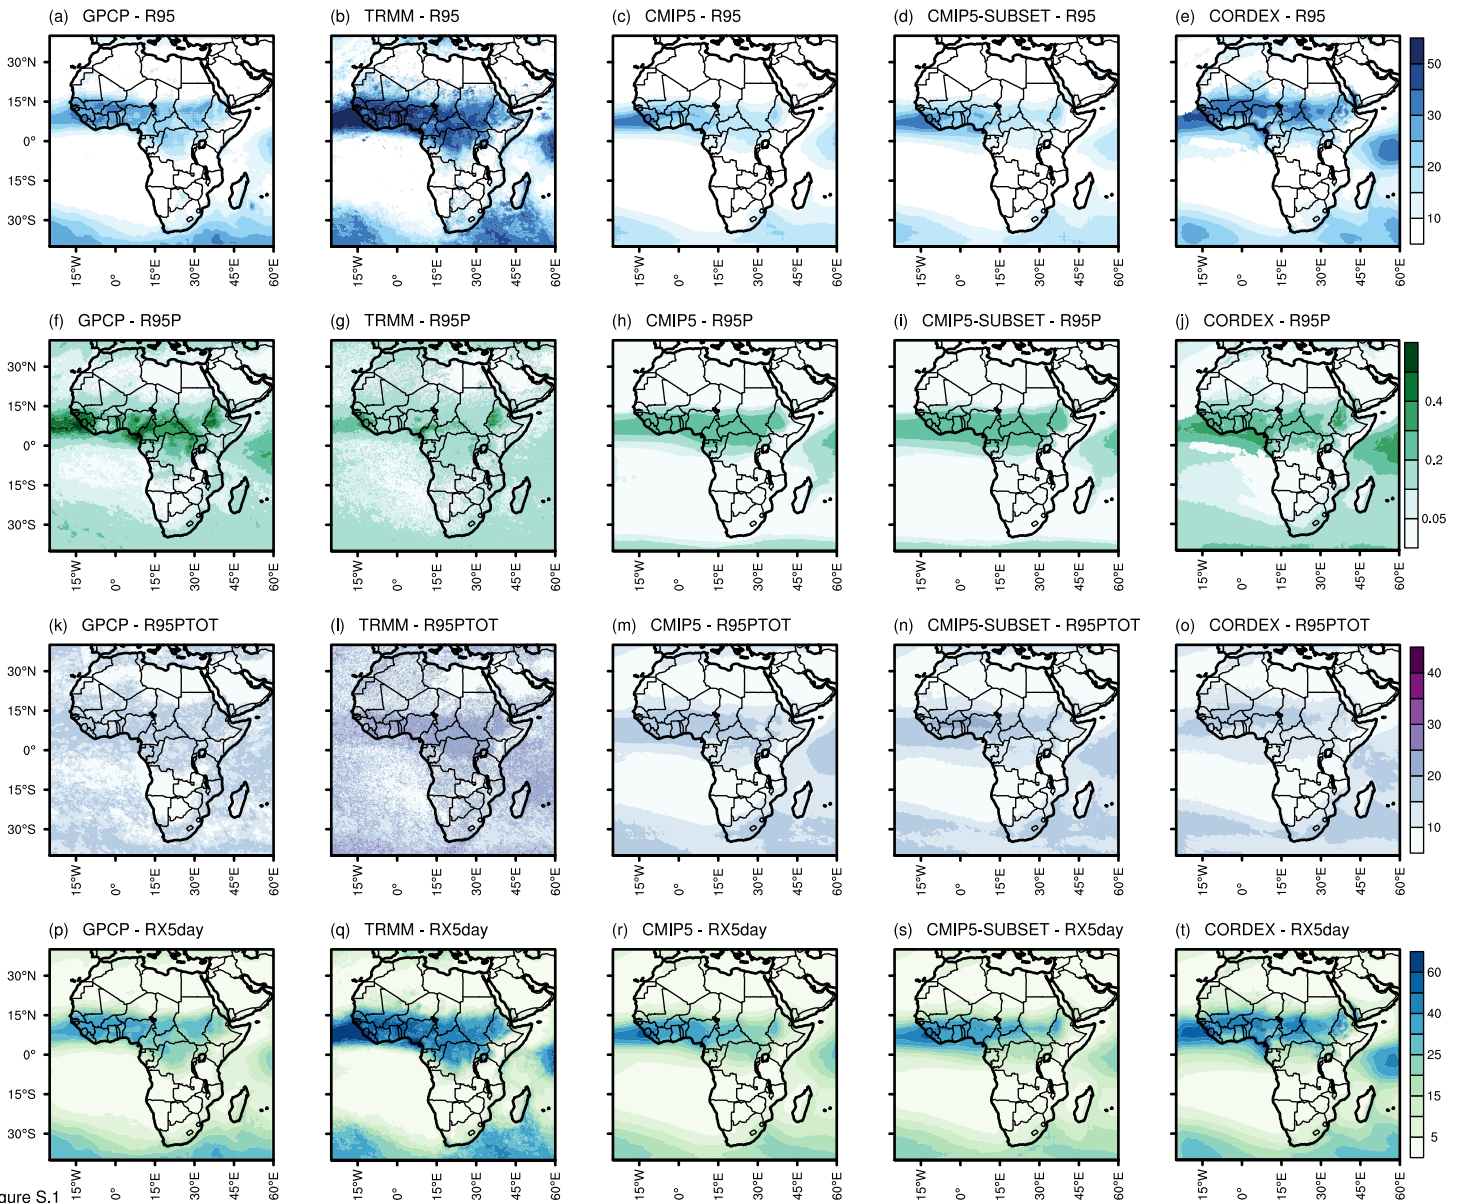

Figure S.1

# NDJFM - Season

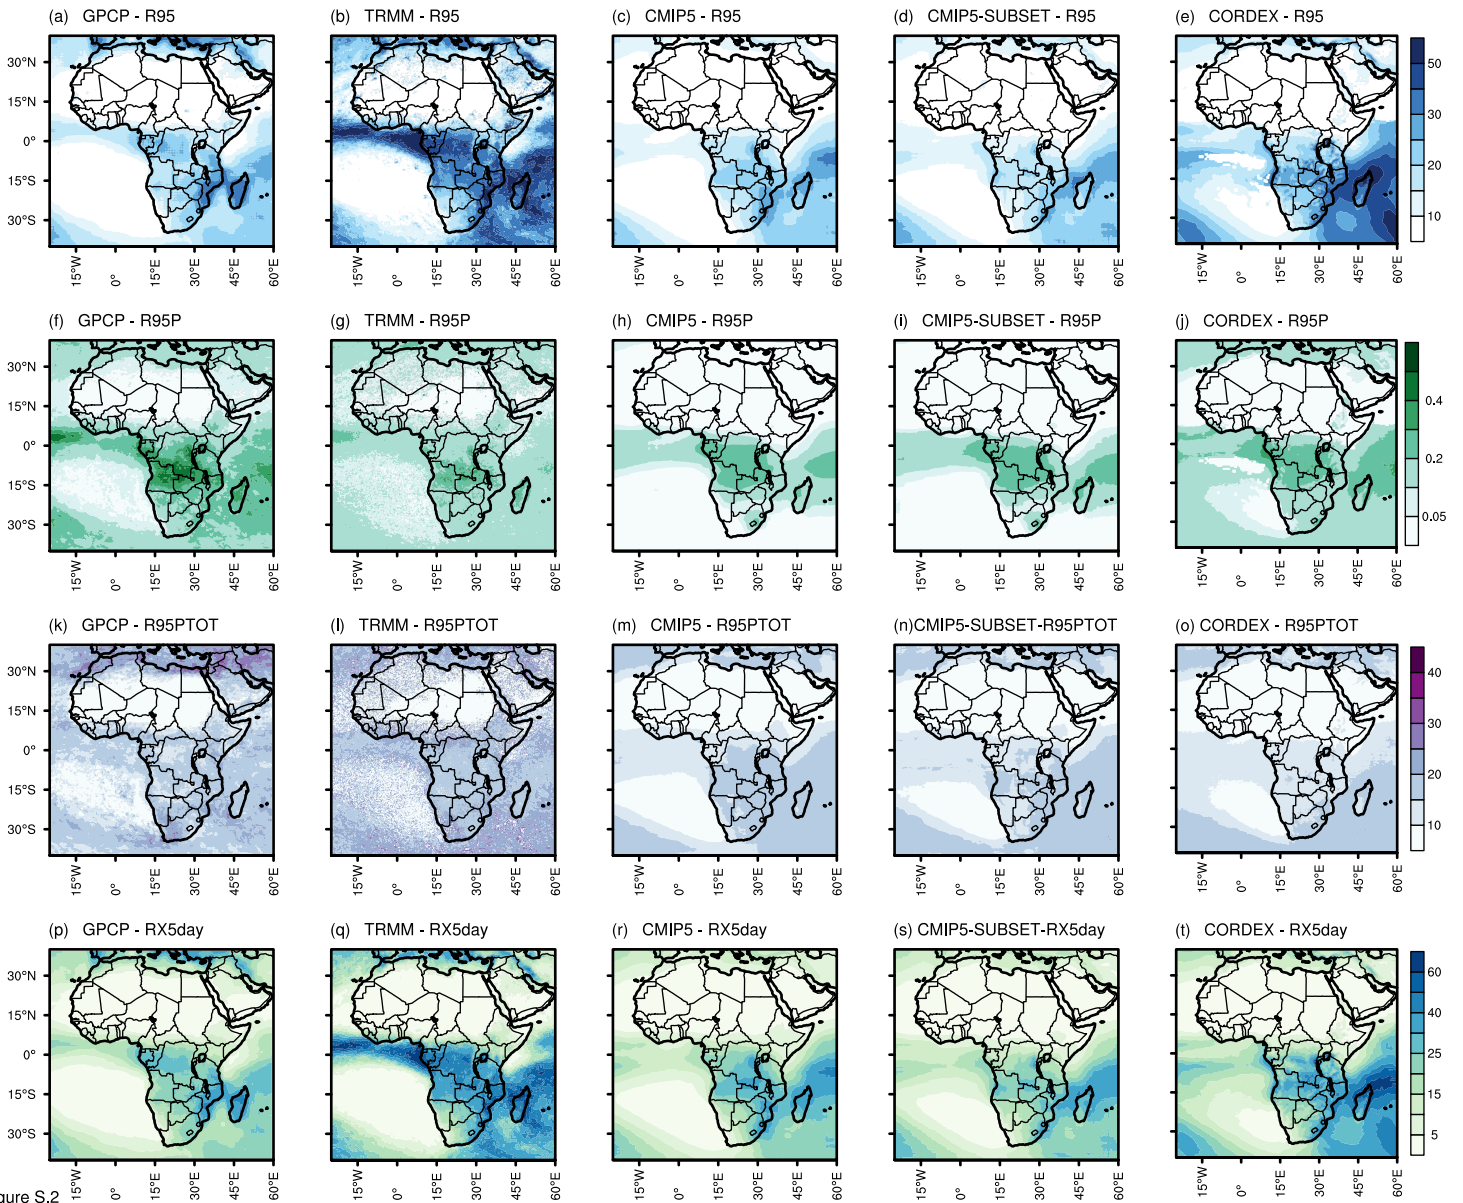

Figure S.2

# JJAS - Season

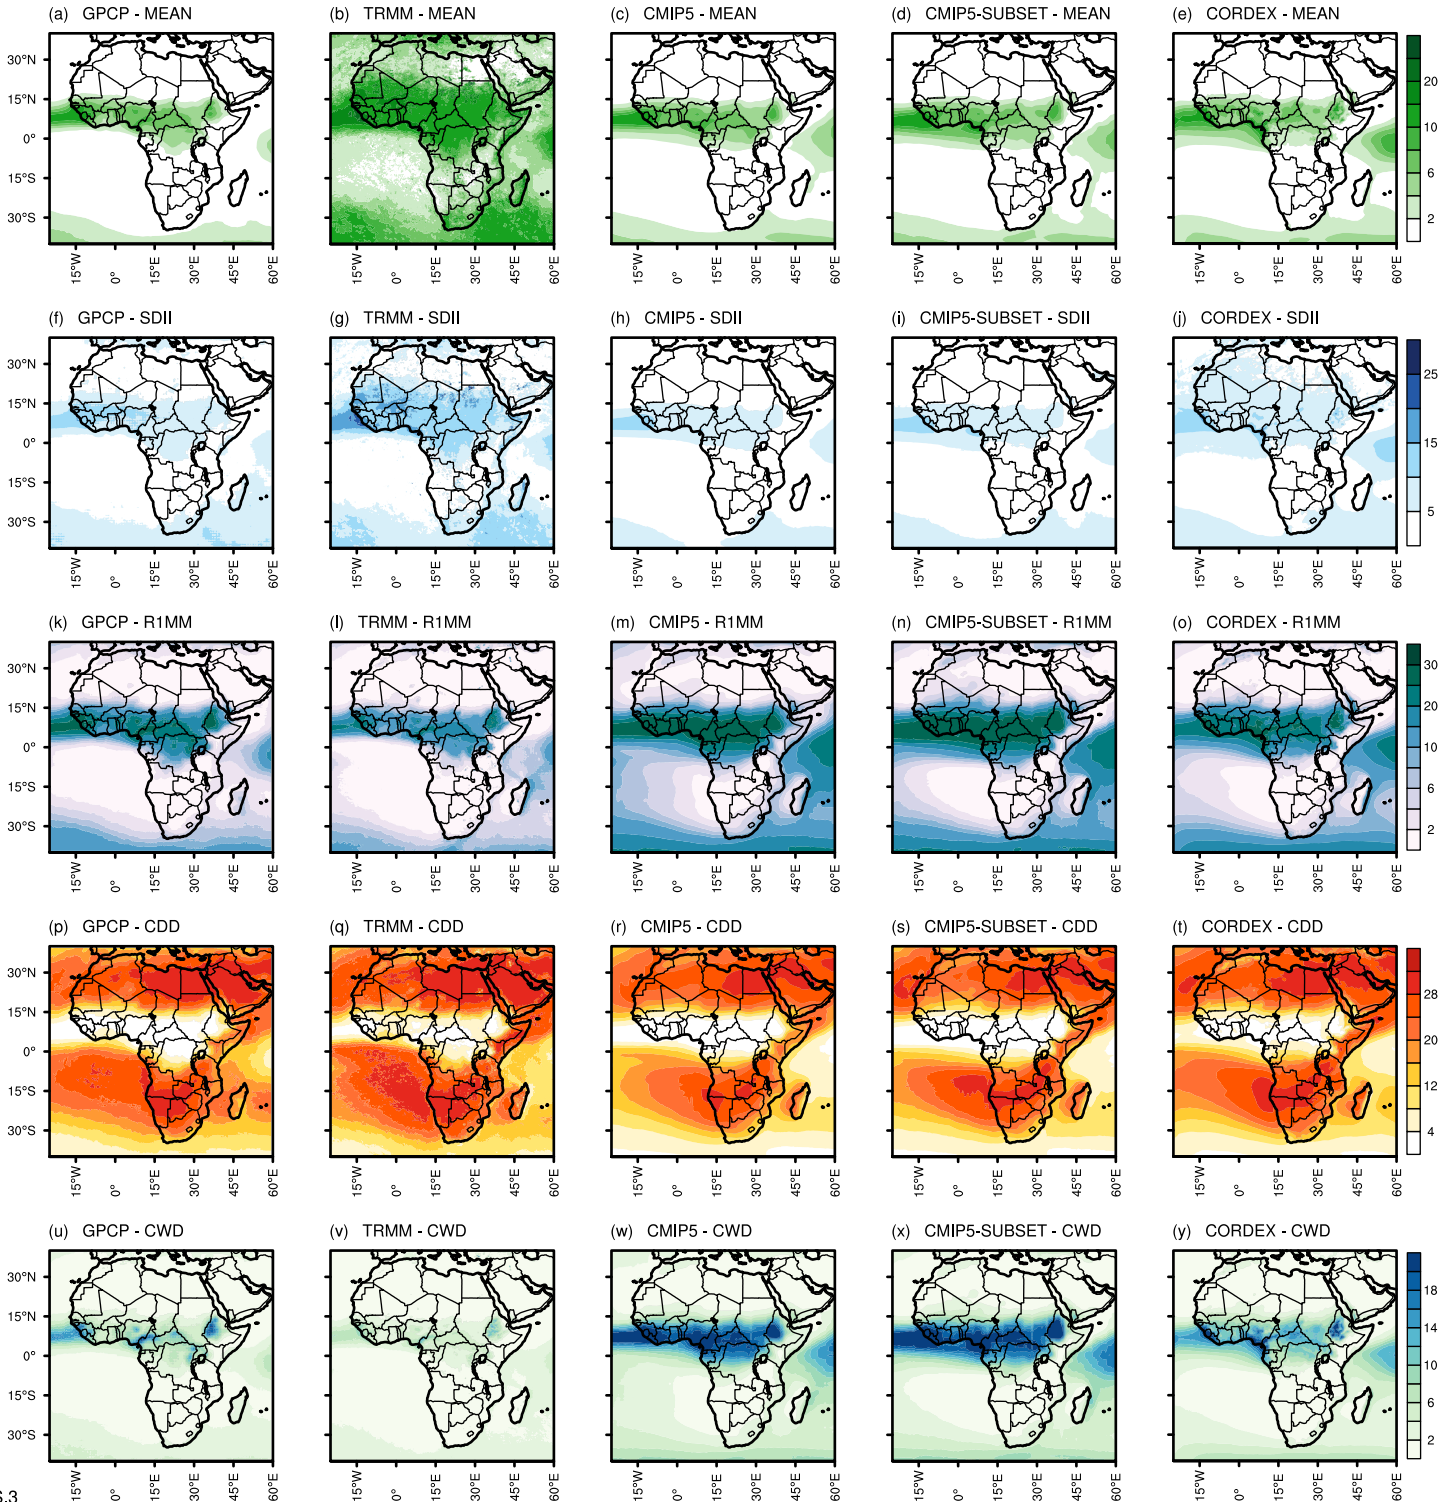

Figure S.3

# NDJFM - Season

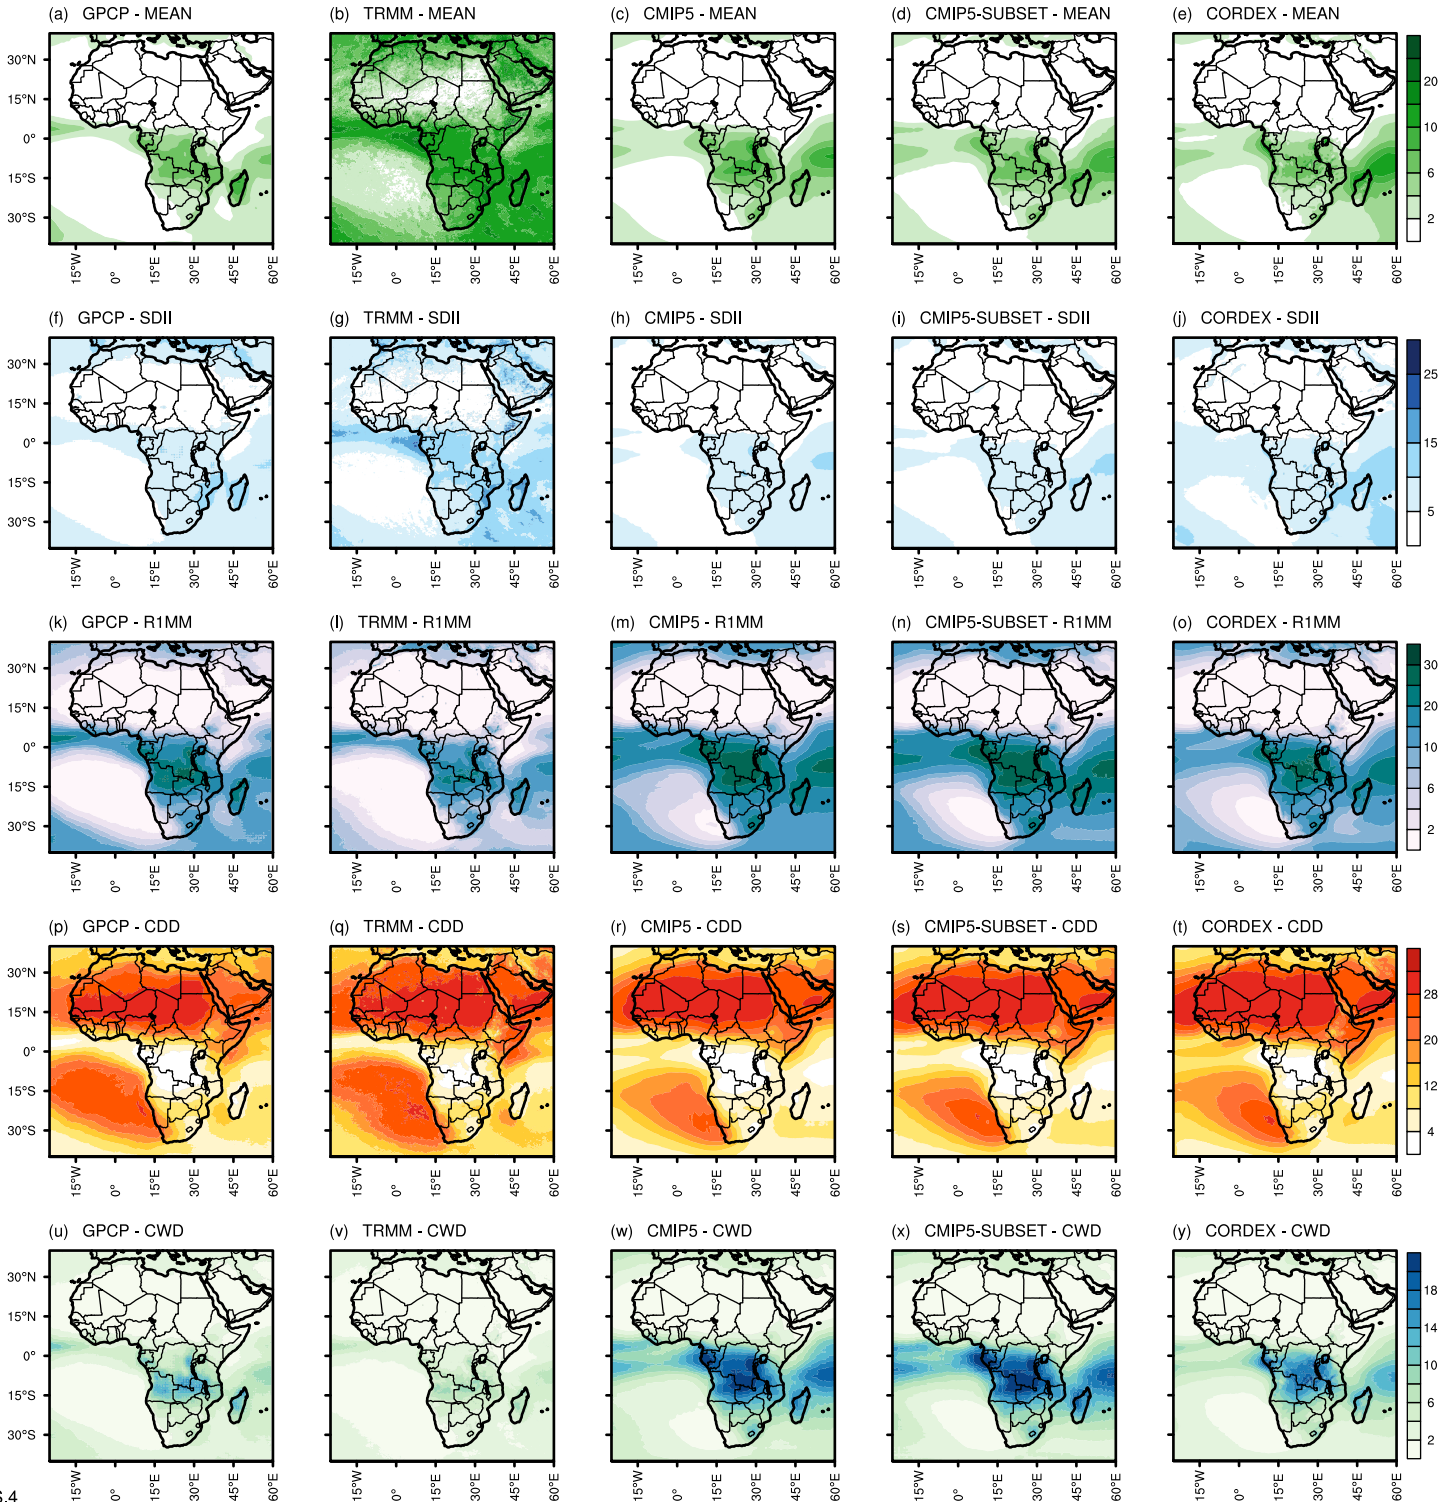

Figure S.4

Supplement: 704_2018_2650_MOESM1_ESM.pdf [file 704_2018_2650_MOESM1_ESM.pdf]
